# Supplementary material for: Structure and electrical properties of tetragonal tungsten bronze Ba2CeFeNb4O15
Source: Royal Society of Chemistry journal article supplement (doi:10.1039/c5ra16115k), 2015-01-01
Supplement: c5ra16115k1.pdf [file c5ra16115k1.pdf]

Electronic Supplementary Material (ESI) for RSC Advances.  
This journal is © The Royal Society of Chemistry 2015

## Supplementary Information

### Structure and Electrical Properties of Tetragonal Tungsten Bronze $\text{Ba}_2\text{CeFeNb}_4\text{O}_{15}$

Hongqiang Ma<sup>a</sup>, Kun Lin<sup>a</sup>, Laijun Liu<sup>c</sup>, Baoling Yang<sup>a</sup>, Yangchun Rong<sup>a</sup>, Jun Chen<sup>a</sup>, Jinxia

Deng<sup>ab</sup>, Shogo Kawaguchi<sup>d</sup>, Kenichi Kato<sup>e</sup>, Xianran Xing<sup>\*,a</sup>

<sup>a</sup> Department of Physical Chemistry, <sup>b</sup> Department of Chemistry, University of Science and  
Technology Beijing, Beijing 100083, China

<sup>c</sup> State Key Laboratory Breeding Base of Nonferrous Metals and Specific Materials Processing,  
Guilin University of Technology, Guilin 541004, China

<sup>d</sup> Japan Synchrotron Radiation Research Institute (JASRI) 1-1-1, Kouto, Sayo-cho, Sayo-gun,  
Hyogo 679-5198,  
Japan

<sup>e</sup> RIKEN SPring-8 Center Sayo, Hyogo 679-5148, Japan

#### **\*Corresponding author**

Department of Physical Chemistry, University of Science and Technology Beijing,

Beijing 100083, China

Tel: + 86-10-62334200

Fax: + 86-10-62332525

\*e-mail

address:

[xing@ustb.edu.cn](mailto:xing@ustb.edu.cn)

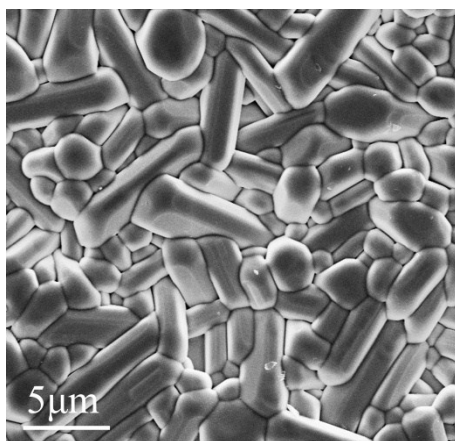

**Fig. S1.** SEM image of selected pellets surface for the as-synthesized BCFN.

The microstructure of BCFN ceramics was observed by scanning electron microscopy (SEM, Supra 55; Zeiss, Oberkochen, Germany). No impurity was observed.

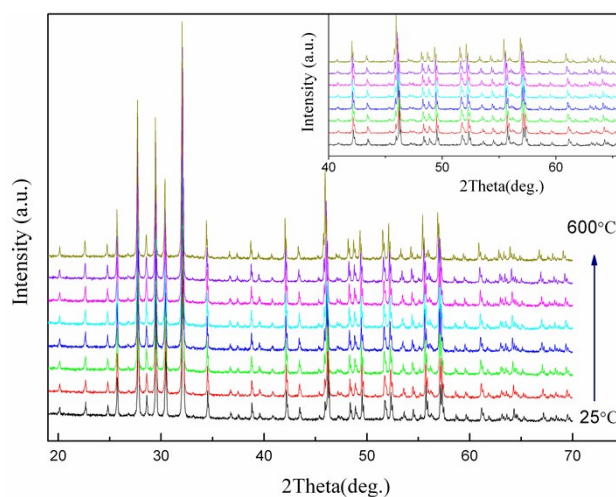

**Fig. S2** XRD patterns of BCFN powder at different temperatures (25 – 600 °C). It shows that no phase transition occurs in the measured temperature.

The high-temperature powder X-ray diffraction patterns were collected on a laboratory diffractometer, (PANalytical X'Pert<sup>III</sup>, Holland, Cu K $\alpha$ ,  $\lambda=1.5406$  Å) and an Anton Par HTK 1200 high-temperature attachment was used. Data were collected in 0.0131° steps. The heating rate was 10 °C/min, and the sample was held for 15 min at a specified temperature to reach heating equilibrium.

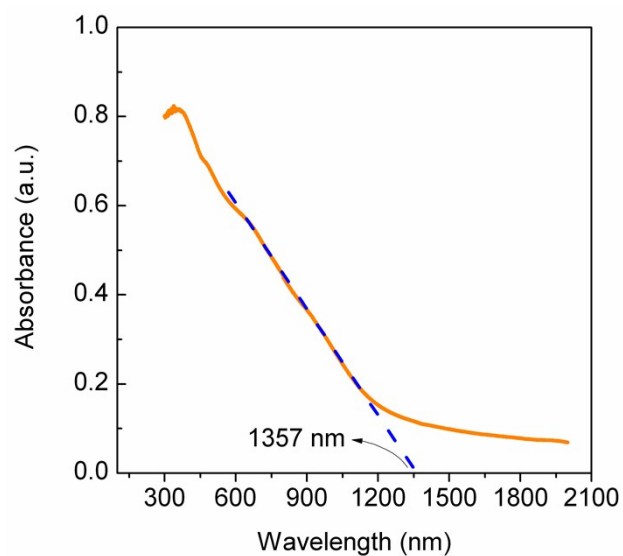

**Fig. S3** UV-vis absorbance spectroscopy of as-sintered BCFN powders. Band gap estimated from the intercept of tangents to the plots was  $\sim 0.91$  eV indicative of the existence of shallow energy levels due to oxygen vacancies.

UV-vis absorbance spectroscopy of the nanostructures was performed using a UV-vis spectrometer (VARIAN, Cary 5000) in a quartz cuvette.

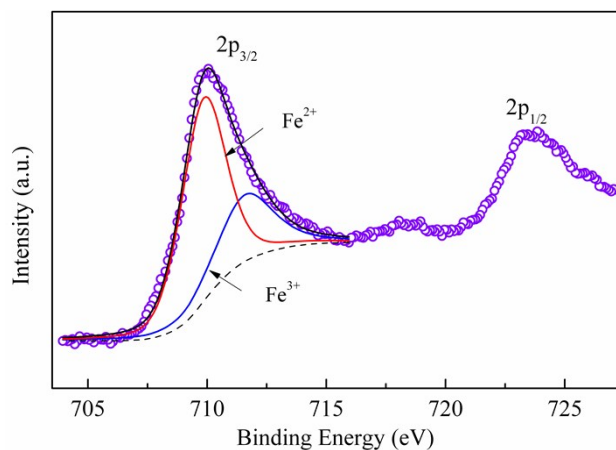

**Fig. S4** X-ray photoelectron spectra of Fe2p for surface of as-sintered BCFN pellet. It suggests that the  $\text{Fe}^{3+}$  reduction to  $\text{Fe}^{2+}$  and oxygen loss in BCFN are significant in surface.

The surface properties of samples were characterized by X-ray photoelectron spectroscopy (XPS) on a ESCALAB 250 Xi (VG, UK) with Carbon (284.8 eV) as a marker.

**Table S1 BVS Values Based on the Data Obtained from SPD Data**

| Atom | BVS     | Atom | BVS     |
|------|---------|------|---------|
| Ce   | 2.87(2) | O1   | 1.89(1) |
| Ba   | 2.02(1) | O2   | 2.06(2) |
| Fe1  | 3.31(3) | O3   | 1.95(1) |
| Nb1  | 5.10(4) | O4   | 2.22(3) |
| Fe2  | 3.31(3) | O5   | 1.98(3) |
| Nb2  | 5.10(4) |      |         |

Bond valence sums (BVS)<sup>1</sup> calculated from the refinements in Table S1 supports the validity of the structure and indicates the dominated existence of Fe<sup>3+</sup> and Ce<sup>3+</sup> instead of Fe<sup>2+</sup> and Ce<sup>4+</sup>. Based on the XPS data in Fig. S4, defect concentration in surface are larger than that inside the grains.

---

<sup>1</sup> D. Brown, and D. Altermatt, *Acta Crystallogr.* 1985, **B41**, 244-247.
